# Supplementary material for: The effect of preparation conditions and biopolymer dispersants on the properties of SWNT buckypapers
Source: Royal Society of Chemistry journal article supplement (doi:10.1039/b914824h), 2009-01-01
Supplement: b914824h.pdf [file b914824h.pdf]

**Supplementary Table 1.**

Effect of varying preparation conditions on the physical and electrical properties of  
 SWNT buckypapers.

| Dispersant   | Membrane filter          | Final dispersion volume (ml) | Sonication time (min) | Thickness ( $\mu\text{m}$ ) | Density ( $\text{kg m}^{-3}$ ) | Contact angle ( $^{\circ}$ ) | Conductivity ( $\text{S cm}^{-1}$ ) |
|--------------|--------------------------|------------------------------|-----------------------|-----------------------------|--------------------------------|------------------------------|-------------------------------------|
| Triton X-100 | 5.0 $\mu\text{m}$ PTFE   | 1000                         | 24                    | 31.5 $\pm$ 3.5              | 1160 $\pm$ 20                  | 73 $\pm$ 5                   | 127 $\pm$ 11                        |
| Triton X-10  | 0.45 $\mu\text{m}$ PVDF  | 1000                         | 24                    | 28.0 $\pm$ 2.5              | 1330 $\pm$ 60                  | 74 $\pm$ 6                   | 124 $\pm$ 3                         |
| Triton X-100 | 0.45 $\mu\text{m}$ nylon | 1000                         | 24                    | 28.5 $\pm$ 1.0              | 1300 $\pm$ 40                  | 75 $\pm$ 5                   | 142 $\pm$ 8                         |
| Triton X-100 | 0.20 $\mu\text{m}$ CN    | 1000                         | 24                    | 32.5 $\pm$ 3.0              | 1380 $\pm$ 80                  | 70 $\pm$ 7                   | 106 $\pm$ 5                         |
| Triton X-100 | 5.0 $\mu\text{m}$ PTFE   | 500                          | 24                    | 35.0 $\pm$ 2.5              | 1090 $\pm$ 30                  | 78 $\pm$ 7                   | 94 $\pm$ 4                          |
| Triton X-100 | 5.0 $\mu\text{m}$ PTFE   | 250                          | 24                    | 36.0 $\pm$ 1.0              | 1090 $\pm$ 30                  | 68 $\pm$ 8                   | 84 $\pm$ 4                          |
| Triton X-100 | 5.0 $\mu\text{m}$ PTFE   | 80                           | 24                    | 41.5 $\pm$ 2.0              | 1360 $\pm$ 80                  | 73 $\pm$ 6                   | 80 $\pm$ 6                          |
| Triton X-100 | 0.20 $\mu\text{m}$ CN    | 80                           | 24                    | 53.0 $\pm$ 4.0              | 1100 $\pm$ 50                  | 69 $\pm$ 3                   | 79 $\pm$ 6                          |
| Triton X-100 | 5.0 $\mu\text{m}$ PTFE   | 1000                         | 12                    | 29.0 $\pm$ 1.5              | 1150 $\pm$ 50                  | 0                            | 100 $\pm$ 9                         |
| Triton X-100 | 5.0 $\mu\text{m}$ PTFE   | 1000                         | 36                    | 10.5 $\pm$ 1.0              | 1120 $\pm$ 20                  | 70 $\pm$ 7                   | 101 $\pm$ 5                         |
| Triton X-100 | 5.0 $\mu\text{m}$ PTFE   | 1000                         | 48                    | 9.5 $\pm$ 2.0               | 1360 $\pm$ 50                  | 51 $\pm$ 8                   | 64 $\pm$ 3                          |
| Triton X-100 | 0.45 $\mu\text{m}$ nylon | 80                           | 24                    | 31.0 $\pm$ 2.0              | 1130 $\pm$ 60                  | 73 $\pm$ 4                   | 85 $\pm$ 5                          |
|              |                          |                              |                       |                             |                                |                              |                                     |
| Lysozyme     | 0.45 $\mu\text{m}$ nylon | 1000                         | 24                    | 35.5 $\pm$ 3.0              | 1075 $\pm$ 50                  | 80 $\pm$ 7                   | 138 $\pm$ 6                         |
| Lysozyme     | 0.45 $\mu\text{m}$ nylon | 500                          | 24                    | 90.0 $\pm$ 4.5              | 1060 $\pm$ 30                  | 92 $\pm$ 6                   | 132 $\pm$ 5                         |
| Lysozyme     | 0.45 $\mu\text{m}$ nylon | 250                          | 24                    | 54.0 $\pm$ 5.5              | 1240 $\pm$ 60                  | 88 $\pm$ 7                   | 127 $\pm$ 6                         |
| Lysozyme     | 0.45 $\mu\text{m}$ nylon | 80                           | 24                    | 55.0 $\pm$ 2.5              | 1300 $\pm$ 60                  | 74 $\pm$ 4                   | 52 $\pm$ 3                          |
| Lysozyme     | 5.0 $\mu\text{m}$ PTFE   | 80                           | 24                    | 88.0 $\pm$ 6.0              | 1085 $\pm$ 50                  | 63 $\pm$ 3                   | 25 $\pm$ 4                          |
| Lysozyme     | 0.20 $\mu\text{m}$ CN    | 80                           | 24                    | 76.0 $\pm$ 3.5              | 1095 $\pm$ 50                  | 75 $\pm$ 5                   | 44 $\pm$ 5                          |
| Lysozyme     | 0.45 $\mu\text{m}$ nylon | 1000                         | 12                    | 84.0 $\pm$ 3.0              | 930 $\pm$ 40                   | 79 $\pm$ 4                   | 32 $\pm$ 5                          |
| Lysozyme     | 0.45 $\mu\text{m}$ nylon | 1000                         | 36                    | 67.0 $\pm$ 4.0              | 1130 $\pm$ 20                  | 73 $\pm$ 5                   | 12 $\pm$ 3                          |
| Lysozyme     | 0.45 $\mu\text{m}$ nylon | 1000                         | 48                    | 75.5 $\pm$ 4.5              | 1030 $\pm$ 30                  | 58 $\pm$ 2                   | 10 $\pm$ 3                          |
|              |                          |                              |                       |                             |                                |                              |                                     |
| BSA          | 0.20 $\mu\text{m}$ CN    | 1000                         | 24                    | 72.0 $\pm$ 2.5              | 1370 $\pm$ 60                  | 99 $\pm$ 6                   | 26 $\pm$ 3                          |
| BSA          | 0.20 $\mu\text{m}$ CN    | 500                          | 24                    | 69.0 $\pm$ 3.0              | 940 $\pm$ 30                   | 104 $\pm$ 10                 | 19 $\pm$ 3                          |
| BSA          | 0.20 $\mu\text{m}$ CN    | 250                          | 24                    | 84.0 $\pm$ 3.0              | 1110 $\pm$ 70                  | 93 $\pm$ 5                   | 15 $\pm$ 3                          |
| BSA          | 0.20 $\mu\text{m}$ CN    | 80                           | 24                    | 74.0 $\pm$ 2.5              | 990 $\pm$ 20                   | 65 $\pm$ 10                  | 12 $\pm$ 3                          |
| BSA          | 0.20 $\mu\text{m}$ CN    | 1000                         | 12                    | 83.5 $\pm$ 4.5              | 1090 $\pm$ 50                  | 99 $\pm$ 11                  | 16 $\pm$ 4                          |
| BSA          | 0.20 $\mu\text{m}$ CN    | 1000                         | 36                    | 66.5 $\pm$ 5.0              | 1240 $\pm$ 80                  | 79 $\pm$ 3                   | 9 $\pm$ 2                           |
| BSA          | 0.20 $\mu\text{m}$ CN    | 1000                         | 48                    | 73.5 $\pm$ 4.5              | 1150 $\pm$ 40                  | 59 $\pm$ 2                   | 4 $\pm$ 1                           |
| BSA          | 0.45 $\mu\text{m}$ nylon | 80                           | 24                    | 74.0 $\pm$ 2.5              | 1050 $\pm$ 30                  | 67 $\pm$ 6                   | 12 $\pm$ 3                          |
|              |                          |                              |                       |                             |                                |                              |                                     |
| Chitosan     | 0.45 $\mu\text{m}$ nylon | 80                           | 24                    | 67.0 $\pm$ 2.0              | 1120 $\pm$ 50                  | 76 $\pm$ 4                   | 47 $\pm$ 3                          |
| Chitosan     | 0.20 $\mu\text{m}$ CN    | 80                           | 24                    | 70.0 $\pm$ 2.5              | 1220 $\pm$ 60                  | 85.0 $\pm$ 5                 | 40 $\pm$ 4                          |
| Gellan gum   | 0.45 $\mu\text{m}$ nylon | 80                           | 24                    | 114.0 $\pm$ 6.0             | 1120 $\pm$ 60                  | 71 $\pm$ 5                   | 4 $\pm$ 1                           |
| Gellan gum   | 0.20 $\mu\text{m}$ CN    | 80                           | 24                    | 117.5 $\pm$ 3.0             | 1220 $\pm$ 40                  | 61 $\pm$ 3                   | 3 $\pm$ 1                           |

**Supplementary Table 2.**

Effect of varying preparation conditions on the mechanical properties of SWNT  
 buckypapers.

| Dispersant   | Membrane filter | Final dispersion volume (ml) | Sonication time (min) | Young's modulus (GPa) | Tensile strength (MPa) | Ductility (% El) | Toughness (J g <sup>-1</sup> ) |
|--------------|-----------------|------------------------------|-----------------------|-----------------------|------------------------|------------------|--------------------------------|
| Triton X-100 | 5.0 µm PTFE     | 1000                         | 24                    | 1.6 ± 0.6             | 15.7 ± 6.4             | 2.1 ± 0.5        | 0.11 ± 0.1                     |
| Triton X-100 | 0.45 µm PVDF    | 1000                         | 24                    | 2.7 ± 0.7             | 29.5 ± 4.6             | 1.1 ± 0.2        | 0.12 ± 0.02                    |
| Triton X-100 | 0.45 µm nylon   | 1000                         | 24                    | 2.5 ± 0.2             | 18.0 ± 0.4             | 1.8 ± 0.1        | 0.12 ± 0.01                    |
| Triton X-100 | 0.20 µm CN      | 1000                         | 24                    | 3.1 ± 0.2             | 35.0 ± 7.7             | 2.2 ± 0.5        | 0.36 ± 0.09                    |
| Triton X-100 | 5.0 µm PTFE     | 500                          | 24                    | 1.6 ± 0.1             | 21.3 ± 3.7             | 1.8 ± 0.2        | 0.19 ± 0.01                    |
| Triton X-100 | 5.0 µm PTFE     | 250                          | 24                    | 1.3 ± 0.5             | 20.6 ± 9.5             | 2.3 ± 0.9        | 0.20 ± 0.01                    |
| Triton X-100 | 5.0 µm PTFE     | 80                           | 24                    | 1.4 ± 0.2             | 17.5 ± 5.0             | 2.1 ± 0.7        | 0.13 ± 0.01                    |
| Triton X-100 | 5.0 µm PTFE     | 1000                         | 12                    | 0.9 ± 0.4             | 11.6 ± 2.3             | 2.4 ± 0.1        | 0.14 ± 0.01                    |
| Triton X-100 | 5.0 µm PTFE     | 1000                         | 36                    | 1.0 ± 0.2             | 11.7 ± 3.5             | 2.8 ± 0.3        | 0.32 ± 0.06                    |
| Triton X-100 | 5.0 µm PTFE     | 1000                         | 48                    | 0.8 ± 0.1             | 6.7 ± 1.2              | 0.9 ± 0.4        | 0.05 ± 0.03                    |
| Triton X-100 | 0.45 µm nylon   | 80                           | 24                    | 1.5 ± 0.6             | 20.8 ± 4.3             | 1.2 ± 0.2        | 0.12 ± 0.03                    |
|              |                 |                              |                       |                       |                        |                  |                                |
| Lysozyme     | 0.45 µm nylon   | 1000                         | 24                    | 1.1 ± 0.8             | 16.0 ± 5.9             | 1.3 ± 0.1        | 0.05 ± 0.03                    |
| Lysozyme     | 0.45 µm nylon   | 500                          | 24                    | 0.9 ± 0.3             | 18.9 ± 3.0             | 3.4 ± 0.6        | 0.46 ± 0.04                    |
| Lysozyme     | 0.45 µm nylon   | 250                          | 24                    | 1.8 ± 0.7             | 9.7 ± 0.2              | 1.0 ± 0.1        | 0.05 ± 0.01                    |
| Lysozyme     | 0.45 µm nylon   | 80                           | 24                    | 1.3 ± 0.3             | 25.0 ± 8.4             | 1.2 ± 0.6        | 0.17 ± 0.04                    |
| Lysozyme     | 5.0 µm PTFE     | 80                           | 24                    | 0.9 ± 0.1             | 12.7 ± 7.6             | 2.5 ± 0.1        | 0.05 ± 0.02                    |
| Lysozyme     | 0.20 µm CN      | 80                           | 24                    | 1.7 ± 0.1             | 20.9 ± 5.5             | 1.9 ± 0.1        | 0.27 ± 0.01                    |
| Lysozyme     | 0.45 µm nylon   | 1000                         | 12                    | 1.1 ± 0.2             | 13.4 ± 0.5             | 1.2 ± 0.1        | 0.06 ± 0.01                    |
| Lysozyme     | 0.45 µm nylon   | 1000                         | 36                    | 2.4 ± 0.5             | 9.0 ± 2.9              | 2.8 ± 0.8        | 0.19 ± 0.03                    |
| Lysozyme     | 0.45 µm nylon   | 1000                         | 48                    | 1.0 ± 0.2             | 11.2 ± 0.8             | 1.2 ± 0.1        | 0.07 ± 0.01                    |
|              |                 |                              |                       |                       |                        |                  |                                |
| BSA          | 0.20 µm CN      | 1000                         | 24                    | 1.9 ± 0.4             | 23.3 ± 5.6             | 1.3 ± 0.2        | 0.13 ± 0.07                    |
| BSA          | 0.20 µm CN      | 500                          | 24                    | 1.7 ± 0.2             | 12.5 ± 0.5             | 0.8 ± 0.1        | 0.06 ± 0.01                    |
| BSA          | 0.20 µm CN      | 250                          | 24                    | 0.9 ± 0.1             | 10.5 ± 2.1             | 1.8 ± 0.5        | 0.09 ± 0.02                    |
| BSA          | 0.20 µm CN      | 80                           | 24                    | 0.8 ± 0.3             | 24.8 ± 2.9             | 4.8 ± 0.3        | 0.84 ± 0.16                    |
| BSA          | 0.20 µm CN      | 1000                         | 12                    | 1.8 ± 0.1             | 11.6 ± 3.7             | 1.0 ± 0.2        | 0.09 ± 0.02                    |
| BSA          | 0.20 µm CN      | 1000                         | 36                    | 0.7 ± 0.1             | 11.2 ± 3.8             | 1.8 ± 0.7        | 0.05 ± 0.01                    |
| BSA          | 0.20 µm CN      | 1000                         | 48                    | 1.2 ± 0.2             | 11.3 ± 2.6             | 0.9 ± 0.1        | 0.06 ± 0.02                    |
| BSA          | 0.45 µm nylon   | 80                           | 24                    | 1.8 ± 0.5             | 26.9 ± 4.2             | 3.6 ± 0.5        | 0.65 ± 0.05                    |
|              |                 |                              |                       |                       |                        |                  |                                |
| Chitosan     | 0.45 µm nylon   | 80                           | 24                    | 2.0 ± 0.5             | 32.7 ± 3.5             | 11.4 ± 1.3       | 1.68 ± 0.08                    |
| Chitosan     | 0.20 µm CN      | 80                           | 24                    | 0.4 ± 0.1             | 25.2 ± 1.1             | 8.4 ± 1.3        | 1.68 ± 0.20                    |
| Gellan gum   | 0.45 µm nylon   | 80                           | 24                    | 1.6 ± 0.6             | 39.2 ± 2.4             | 12.6 ± 0.6       | 1.62 ± 0.14                    |
| Gellan gum   | 0.20 µm CN      | 80                           | 24                    | 0.4 ± 0.2             | 30.2 ± 6.3             | 8.4 ± 0.7        | 1.17 ± 0.19                    |

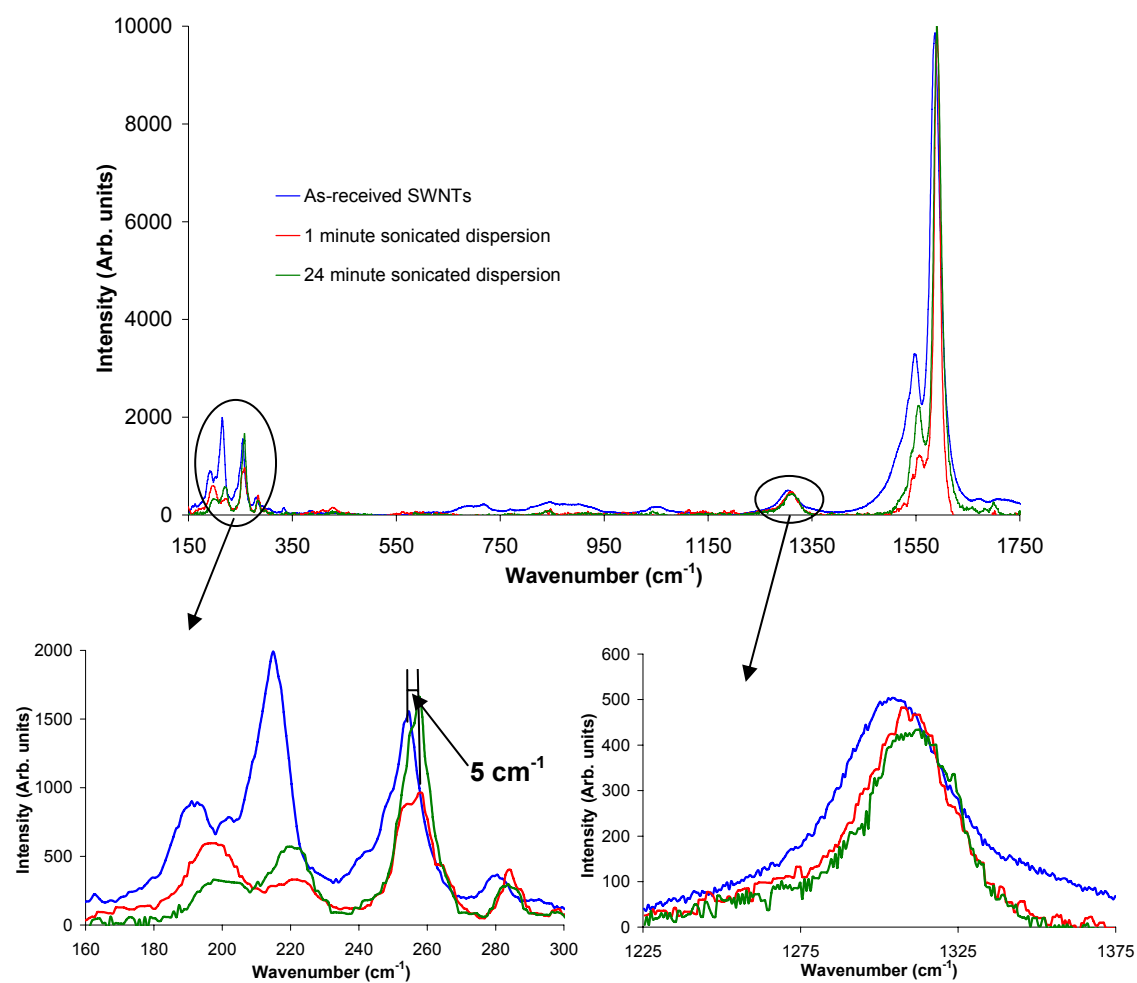

**Supplementary Figure 1.** Raman spectra of as-received SWNTs, and dispersions prepared by sonicating SWNTs and Triton X-100 (1%) for either 1 minute or 24 minutes, normalised with respect to the intensity of the D-band. **(B)** Expanded view of the radial breathing mode region. **(C)** Expanded view of the D Band region.
